# Supplementary material for: Access to mental healthcare in the year after first fit note: a longitudinal study of linked clinical records
Source: HighWire-hosted journal article supplement (doi:10.1136/bmjopen-2020-044725), 2021-11-01
Supplement: bmjopen-2020-044725supp001_data_supplement.pdf [file bmjopen-2020-044725supp001_data_supplement.pdf]

Supplementary table 1 Missing data

| Demographics        | Demographic subgroup | Total (row %)<br>N=69,507 | FFN (per 1000/year) | Hazard ratio<br>(95 CI) |
|---------------------|----------------------|---------------------------|---------------------|-------------------------|
| Gender              | M                    | 38,778 (55.8)             | 45.6                | 1                       |
|                     | F                    | 30,727 (44.2)             | 67.8                | 1.4 (1.3-1.5)           |
| Age (years)         | 16-20                | 12,372 (17.8)             | 40.7                | 1                       |
|                     | 21-25                | 11,231 (16.2)             | 65.6                | 1.8 (1.6-1.9)           |
|                     | 26-30                | 11,203 (16.1)             | 60.3                | 1.6 (1.5-1.8)           |
|                     | 31-35                | 8,455 (12.2)              | 53.2                | 1.4 (1.3-1.6)           |
|                     | 36-40                | 6,647 (9.6)               | 49.6                | 1.3 (1.1-1.5)           |
|                     | 41-45                | 5,907 (8.5)               | 55.5                | 1.5 (1.3-1.6)           |
|                     | 46-50                | 5,842 (8.4)               | 63.0                | 1.7 (1.5-1.9)           |
|                     | 51-55                | 4,601 (6.6)               | 67.4                | 1.8 (1.5-2.1)           |
| Ethnicity           | 56-60                | 3,249 (4.7)               | 69.9                | 1.9 (1.6-2.2)           |
|                     | White                | 9,375 (13.5)              | 68.9                | 1                       |
|                     | Black African        | 3,649 (5.3)               | 64.9                | 0.7 (0.6-0.9)           |
|                     | Asian                | 1,778 (2.6)               | 53.6                | 0.8 (0.7-0.9)           |
|                     | Black Caribbean      | 2,853 (4.1)               | 106.9               | 1.5 (1.3-1.8)           |
|                     | Other/mixed          | 1,568 (2.3)               | 73.4                | 1.1 (0.9-1.2)           |
|                     | Other                | 705 (1.0)                 | 52.3                | 0.8 (0.6-0.9)           |
|                     | Black-other          | 1,950 (2.8)               | 74.6                | 1.1 (0.9-1.3)           |
| IMD score quintiles | Missing              | 47,629 (68.5)             | 46.1                | 0.7 (0.6-0.8)           |
|                     | Least deprived       | 7,650 (11.0)              | 37.5                | 1                       |
|                     | 2                    | 7,298 (10.5)              | 40.9                | 1.1 (0.9-1.3)           |
|                     | 3                    | 6,914 (10.0)              | 40.9                | 1.1 (0.9-1.4)           |
|                     | 4                    | 7,701 (11.1)              | 53.9                | 1.4 (1.2-1.7)           |
|                     | Most deprived        | 6,967 (10.0)              | 57.3                | 1.5 (1.3-1.8)           |
|                     | Missing              | 32,977 (47.4)             | 63.3                | 1.7 (1.3-2.1)           |

Supplementary table 2 Mental healthcare indicators in Lambeth DataNet whole population sample

|                                             |                 | Whole population | Antidepressant prescription (1993-2017) |                  | IAPT contact (2008-2017) |                 | Secondary mental healthcare contact (1995-2017) |                 | No mental health services |                 |
|---------------------------------------------|-----------------|------------------|-----------------------------------------|------------------|--------------------------|-----------------|-------------------------------------------------|-----------------|---------------------------|-----------------|
|                                             |                 | N (%)            | n (%)                                   | OR adj (95%CI)*  | n (%)                    | OR adj (95%CI)* | n (%)                                           | OR adj (95%CI)* | n (%)                     | OR adj (95%CI)* |
| All                                         |                 | 293,933 (100.0)  | 40,870 (13.9)                           |                  | 30,683 (10.4)            |                 | 23,533 (8.0)                                    |                 | 229,468 (78.1)            |                 |
| Gender                                      | Male            | 138,678 (47.2)   | 16,384 (11.8)                           | 1                | 10,982 (7.9)             | 1               | 11,398 (8.2)                                    | 1               | 112,460 (81.1)            | 1               |
|                                             | Female          | 155,255 (52.8)   | 25,562 (16.5)                           | 1.6 (1.5-1.7)    | 19,701 (12.7)            | 1.7 (1.6-1.8)   | 12,135 (7.8)                                    | 0.9 (0.9-1.0)   | 117,008 (75.4)            | 0.7 (0.7-0.7)   |
| Age group (years)                           | 16-30           | 115,294 (39.2)   | 10,632 (9.2)                            | 1                | 10,975 (9.5)             | 1               | 6,601 (5.7)                                     | 1               | 95,497 (82.8)             | 1               |
|                                             | 31-45           | 94,770 (41.3)    | 17,544 (14.5)                           | 1.8 (1.7-1.8)    | 12,997 (10.7)            | 1.2 (1.2-1.3)   | 9,474 (7.8)                                     | 1.3 (1.2-1.4)   | 94,770 (78.1)             | 0.7 (0.7-0.7)   |
|                                             | 46-60           | 39,201 (19.5)    | 13,770 (24.1)                           | 2.6 (2.5-2.8)    | 6,711 (11.7)             | 1.1 (1.0-1.2)   | 7,458 (13.0)                                    | 1.6 (1.4-1.8)   | 39,201 (68.5)             | 0.6 (0.5-0.6)   |
| Ethnicity                                   | White British   | 102,738 (35.0)   | 18,008 (17.5)                           | 1                | 13,520 (13.2)            | 1               | 9,103 (8.9)                                     | 1               | 75,974 (74.0)             | 1               |
|                                             | White-other     | 93,594 (31.8)    | 10,291 (11.0)                           | 0.6 (0.6-0.6)    | 7,663 (8.2)              | 0.6 (0.6-0.6)   | 5,005 (5.4)                                     | 0.6 (0.6-0.6)   | 77,825 (83.2)             | 1.7 (1.6-1.8)   |
|                                             | Black African   | 28,779 (9.8)     | 3,155 (11.0)                            | 0.4 (0.3-0.4)    | 2,003 (7.0)              | 0.4 (0.4-0.5)   | 2,317 (8.1)                                     | 0.6 (0.6-0.7)   | 23,576 (81.9)             | 2.2 (2.0-2.5)   |
|                                             | Asian           | 21,810 (7.4)     | 2,377 (10.9)                            | 0.5 (0.5-0.6)    | 1,497 (6.9)              | 0.5 (0.4-0.6)   | 1,184 (5.4)                                     | 0.6 (0.5-0.7)   | 18,312 (84.0)             | 1.9 (1.8-2.1)   |
|                                             | Black Caribbean | 16,127 (5.5)     | 3,435 (21.3)                            | 0.8 (0.7-0.8)    | 2,452 (15.2)             | 0.9 (0.9-1.0)   | 2,621 (16.3)                                    | 1.3 (1.2-1.4)   | 10,488 (65.0)             | 1.0 (0.9-1.0)   |
|                                             | Mixed           | 13,837 (4.7)     | 2,218 (16.0)                            | 0.8 (0.8-0.9)    | 1,791 (12.9)             | 0.9 (0.8-1.0)   | 1,606 (11.6)                                    | 1.3 (1.2-1.4)   | 10,178 (73.6)             | 1.0 (1.0-1.1)   |
|                                             | Other           | 9,884 (3.4)      | 1,190 (12.0)                            | 0.6 (0.5-0.6)    | 859 (8.7)                | 0.6 (0.5-0.7)   | 654 (6.6)                                       | 0.7 (0.6-0.8)   | 8,079 (81.7)              | 1.7 (1.5-1.9)   |
|                                             | Black-other     | 7,173 (2.4)      | 1,272 (17.7)                            | 0.7 (0.6-0.9)    | 898 (12.5)               | 0.8 (0.7-0.9)   | 1,043 (14.5)                                    | 1.3 (1.1-1.6)   | 5,036 (70.2)              | 1.1 (0.9-1.3)   |
| Quintiles of area-level deprivation         | 1 Low dep       | 81,828 (20.4)    | 7,084 (12.5)                            | 1                | 5,378 (9.5)              | 1               | 3,355 (5.9)                                     | 1               | 46,792 (80.5)             | 1               |
|                                             | 2               | 80,999 (20.2)    | 7,805 (13.5)                            | 1.1 (1.0-1.1)    | 5,869 (10.2)             | 1.1 (1.0-1.1)   | 4,094 (7.1)                                     | 1.2 (1.1-1.2)   | 46,508 (79.8)             | 0.9 (0.9-1.0)   |
|                                             | 3               | 78,103 (19.5)    | 7,711 (13.8)                            | 1.1 (1.0-1.2)    | 5,807 (10.4)             | 1.1 (1.1-1.2)   | 5,326 (7.7)                                     | 1.3 (1.2-1.4)   | 47,404 (78.1)             | 0.9 (0.8-0.9)   |
|                                             | 4               | 81,822 (20.4)    | 8,931 (15.1)                            | 1.2 (1.1-1.2)    | 6,357 (10.8)             | 1.2 (1.1-1.3)   | 5,252 (8.9)                                     | 1.4 (1.3-1.5)   | 44,344 (76.6)             | 0.8 (0.8-0.9)   |
|                                             | 5 High dep      | 78,792 (19.6)    | 9,339 (16.7)                            | 1.2 (1.1-1.3)    | 6,403 (11.4)             | 1.3 (1.2-1.4)   | 6,889 (10.5)                                    | 1.6 (1.4-1.7)   | 44,420 (75.3)             | 0.8 (0.7-0.8)   |
| Number of fit notes                         | 0               | 253,674 (86.3)   | 28,288 (11.2)                           | 1                | 20,778 (8.2)             | 1               | 15,718 (6.2)                                    | 1               | 207,915 (82.0)            | 1               |
|                                             | 1-3             | 25,609 (8.7)     | 6,500 (25.4)                            | 2.4 (2.3-2.5)    | 4,857 (19.0)             | 2.6 (2.4-2.7)   | 3,524 (13.8)                                    | 2.0 (1.9 2.1)   | 16,065 (62.7)             | 0.4 (0.4-0.4)   |
|                                             | 4+              | 14,650 (5.0)     | 7,158 (48.9)                            | 5.7 (5.4-6.1)    | 5,048 (34.5)             | 5.6 (5.3-5.9)   | 4,291 (29.3)                                    | 4.3 (3.9-4.6)   | 5,488 (37.5)              | 0.2 (0.2-0.2)   |
| Number of LTCs (excluding mental disorders) | 0               | 206,758 (70.3)   | 22,891 (11.1)                           | 1                | 18,747 (9.1)             | 1               | 12,142 (5.9)                                    | 1               | 169,493 (82.0)            | 1               |
|                                             | 1               | 63,529 (21.6)    | 11,769 (18.5)                           | 1.6 (1.5-1.6)    | 8,078 (12.7)             | 1.5 (1.4-1.5)   | 6,719 (10.6)                                    | 1.7 (1.6-1.7)   | 46,081 (72.5)             | 0.7 (0.6-0.7)   |
|                                             | 2               | 16,529 (5.6)     | 4,595 (27.7)                            | 2.2 (2.0-2.3)    | 2,581 (15.6)             | 1.8 (1.7-2.0)   | 2,888 (17.4)                                    | 2.6 (2.4-2.7)   | 10,290 (62.1)             | 0.5 (0.4-0.5)   |
|                                             | 3               | 5,253 (1.8)      | 1,821 (34.7)                            | 2.6 (2.3-2.8)    | 875 (16.7)               | 2.0 (1.8-2.3)   | 1,189 (22.6)                                    | 3.2 (2.9-3.5)   | 2,871 (54.7)              | 0.4 (0.3-0.4)   |
|                                             | 4               | 1,822 (0.6)      | 870 (47.8)                              | 4.0 (3.6-4.4)    | 402 (22.1)               | 2.8 (2.4-3.3)   | 595 (32.7)                                      | 5.0 (4.4-5.7)   | 733 (40.2)                | 0.2 (0.2-0.3)   |
| Depression **                               | No              | 262,521 (89.3)   | 18,040 (6.9)                            | 1                | 18,164 (6.9)             | 1               | 13,235 (5.0)                                    | 1               | 224,661 (85.6)            | 1               |
|                                             | Yes             | 31,412 (10.7)    | 23,906 (76.1)                           | 38.7 (35.5-42.1) | 12,519 (39.9)            | 8.0 (7.4-8.7)   | 10,298 (32.8)                                   | 8.4 (8.0-8.8)   | 4,807 (15.3)              | 0.0 (0.0-0.0)   |

LTCs: Long-term conditions. OR: Odds ratio. \*adjusted for age, gender, ethnicity, deprivation and non-mental health long-term conditions \*\* Quality Outcomes Framework
